# Supplementary material
Source: publisher figshare collection journal article supplement (https://aacr.figshare.com/articles/dataset/_/22429812)
Supplement: Supplementary file 1 [file 39876147]

1

**Supplementary Table 3. The sequences of primers used for qRT-PCR**

| <b>Gene name</b> | <b>Forward (5'-3')</b>      | <b>Reverse (5'-3')</b>  |
|------------------|-----------------------------|-------------------------|
| ALDH1A1          | TGTTAGCTGATGCCGACTTG        | TTCTTAGCCCGCTCAACACT    |
| Aldh1a1          | CCCGGATTTTTGTTGAGGAG        | GAGAACACTGTGGGCTGCAC    |
| TAK1             | TGCCCAAACCTCCAAAGAATC       | TGGTCCTTTTCATCCTGGTC    |
| p65              | GTGGGGACTACGACCTGAATG       | GGGGCACGATTGTCAAAGATG   |
| GM-CSF           | CCTGAACCTGAGTAGAGACAC       | TGCTGCTTGTAGTGGCTGG     |
| GM-CSF (Mouse)   | GGCCTTGGAAGCATGTAGAGG       | GAGAACTCGTTAGAGACGACT   |
| G-CSF            | GCTGCTTGAGCCAACTCCATA       | GAACGCGGTACGACACCTC     |
| Tbp (Mouse)      | CCCCACAACCTCTTCCATTCT       | GCAGGAGTGATAGGGGTCAT    |
| TBP (Human)      | TGCACAGGAGCCAAGAGTGAA       | CACATCACAGCTCCCCACCA    |
| mS100A8          | AAATCACCATGCCCTCTACAAG      | CCCACCTTTATCACCATCGCAA  |
| mS100A9          | ATACTCTAGGAAGGAAGGACA<br>CC | TCCATGATGTCATTTATGAGGGC |
| mPD-L1           | GCTCCAAAGGACTTGTACGTG       | TGATCTGAAGGGCAGCATTTC   |
| mNCF1            | ACACCTTCATTGCCATATTGC       | TCGGTGAATTTTCTGTAGACCAC |
| mCYBB1           | TGTGGTTGGGGCTGAATGTC        | CTGAGAAAGGAGAGCAGATTTCG |

2
